# Supplementary material
Source: Springer Nature journal article supplement (https://www.springermedizin.de/resource/supplementary/12885_2013_4499_MOESM3_ESM.pdf/9466574)

### Serrana region

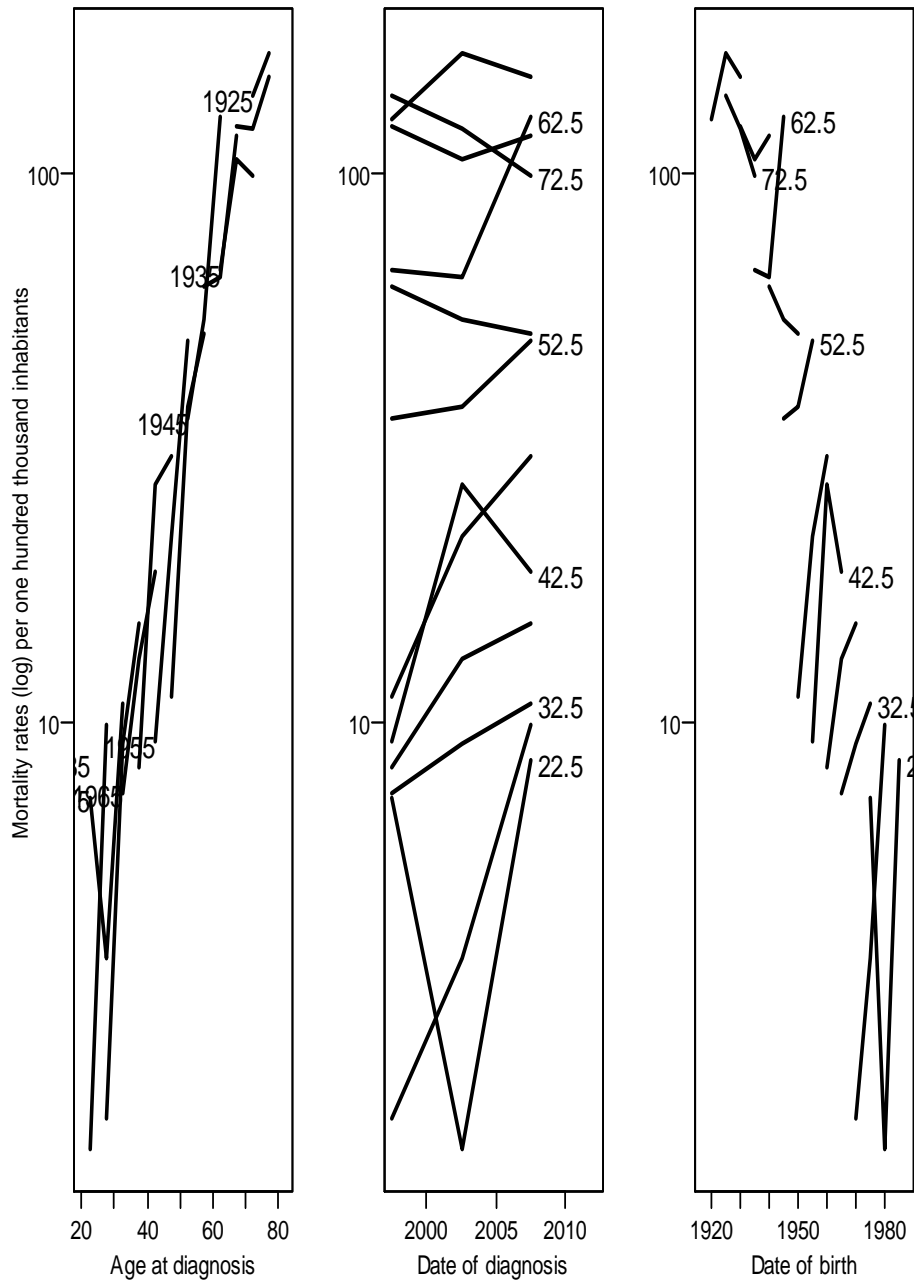

### Metropolitan region

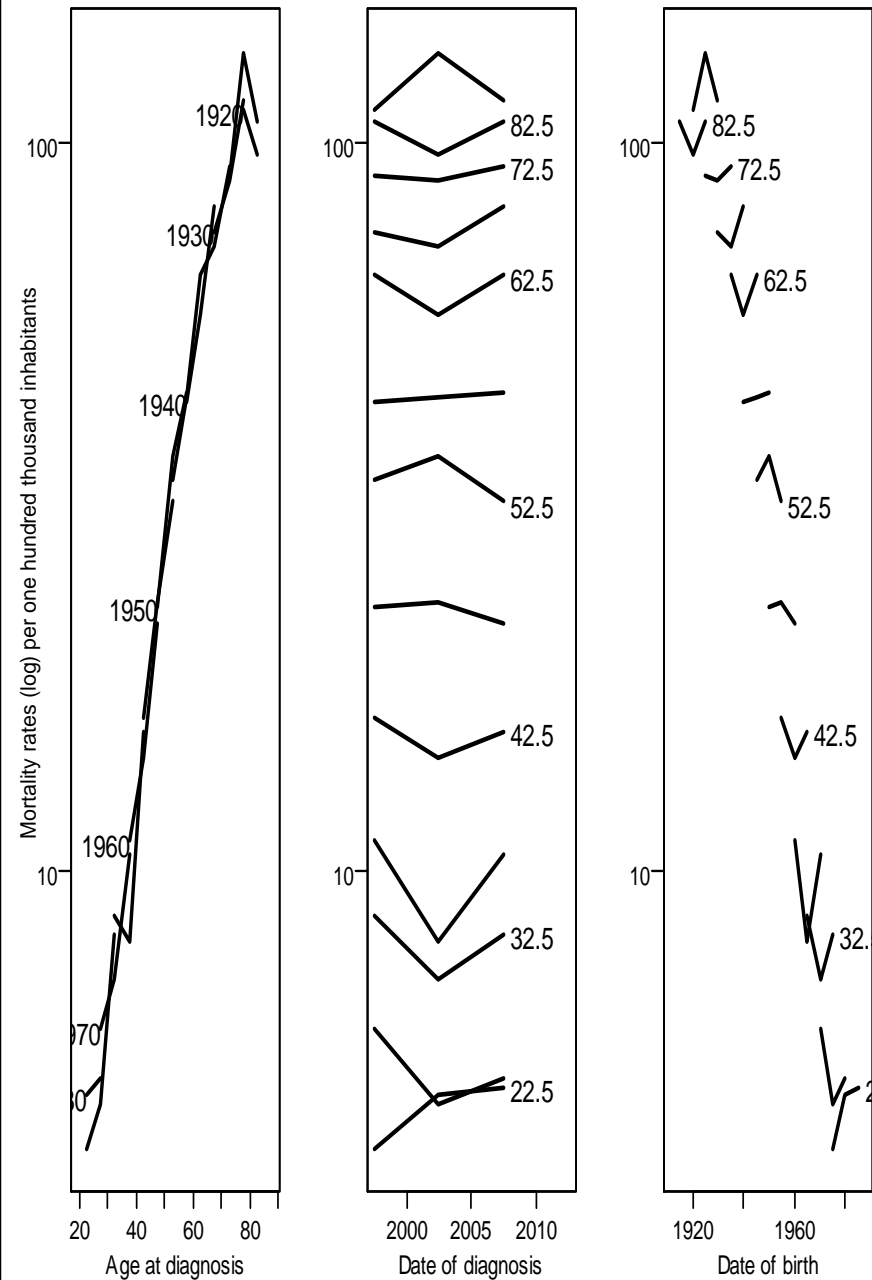

Supplement: MOESM3 [file 9466574]
